# Supplementary material
Source: Springer Nature journal article supplement (https://www.springermedizin.de/resource/supplementary/12991_2013_1413_MOESM2_ESM.pdf/9613828)
Supplement: MOESM2 [file 9613828]

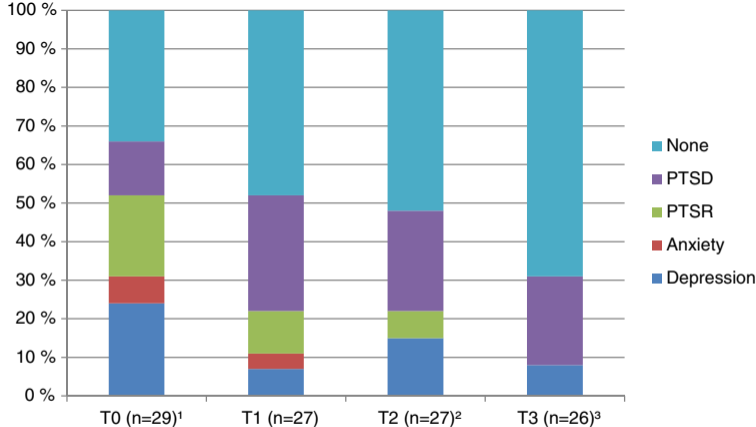

<sup>1</sup>The percentage of co-morbid diagnoses i.e. anxiety, depression or PTSR were 21 %.

<sup>2</sup>The percentage of co-morbid diagnoses i.e. depression, PTSR or PTSD were 15%.

<sup>3</sup>The percentage of co-morbid diagnoses i.e. PTSD and depression were 8 %.
